# Supplementary material for: Bismuth drives the morphology and piezoresistivity of lead-free (TMSO)3Sn3xBi2(1−x)I9 halide perovskite thin films
Source: Royal Society of Chemistry journal article supplement (doi:10.1039/d4tc01777c), 2024-01-01
Supplement: d4tc01777c1.pdf [file d4tc01777c1.pdf]

## Supporting Information

# Bismuth Drives the Morphology and Piezoresistivity of Lead-free $(\text{TMSO})_3\text{Sn}_{3x}\text{Bi}_{2(1-x)}\text{I}_9$ Halide Perovskite thin films

Simone Virga,<sup>a</sup> Giuseppe Arrabito,<sup>a</sup> Vittorio Ferrara,<sup>a</sup> Michelangelo Scopelliti,<sup>a</sup> Alessandro Longo,<sup>b</sup> Bruno Pignataro,<sup>\*a</sup> and Francesco Giannici<sup>\*a</sup>

a. Dipartimento di Fisica e Chimica "Emilio Segrè", Università degli Studi di Palermo, Viale delle Scienze, 90128 Palermo, Italy. E-mail: bruno.pignataro@unipa.it; francesco.giannici@unipa.it

b. European Synchrotron Radiation Facility, 71, avenue des Martyrs, CS 40220, 38043 Grenoble Cedex 9, France and Consiglio Nazionale delle Ricerche, ISMN-CNR, I-90146 Palermo, Italy.

**Table S1.** Reagents used for each synthesis and their respective labels.

| Label | Formula                                                     | TMSO <sup>+</sup> mmol | Sn <sup>2+</sup> mmol | Bi <sup>3+</sup> mmol |
|-------|-------------------------------------------------------------|------------------------|-----------------------|-----------------------|
| Bi0   | $(\text{TMSO})\text{SnI}_3$                                 | 1                      | 1                     | --                    |
| Bi25  | $(\text{TMSO})_3\text{Sn}_{3x}\text{Bi}_{2(1-x)}\text{I}_9$ | 1                      | 0.75                  | 0.25                  |
| Bi50  | $(\text{TMSO})_3\text{Sn}_{3x}\text{Bi}_{2(1-x)}\text{I}_9$ | 1                      | 0.5                   | 0.5                   |
| Bi75  | $(\text{TMSO})_3\text{Sn}_{3x}\text{Bi}_{2(1-x)}\text{I}_9$ | 1                      | 0.25                  | 0.75                  |
| Bi100 | $(\text{TMSO})_3\text{Bi}_2\text{I}_9$                      | 1                      | --                    | 1                     |

**Fig. S1** Rietveld refinement plots for  $(\text{TMSO})\text{SnI}_3$  (Bi0). Observed and calculated traces in blue and red, respectively, with the difference plot (in cyan) and peak markers (blue bars) at the bottom.

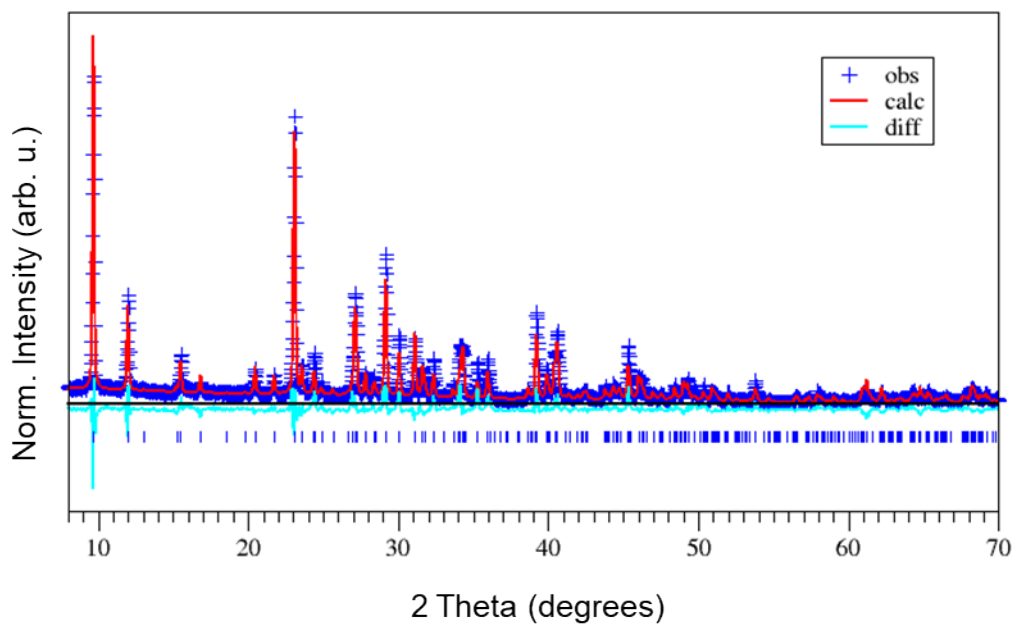

**Fig. S2** Rietveld refinement plots for  $(\text{TMSO})_3\text{Bi}_2\text{I}_9$  (Bi100). Observed and calculated traces in blue and red, respectively, with the difference plot (in cyan) and peak markers (blue bars) at the bottom.

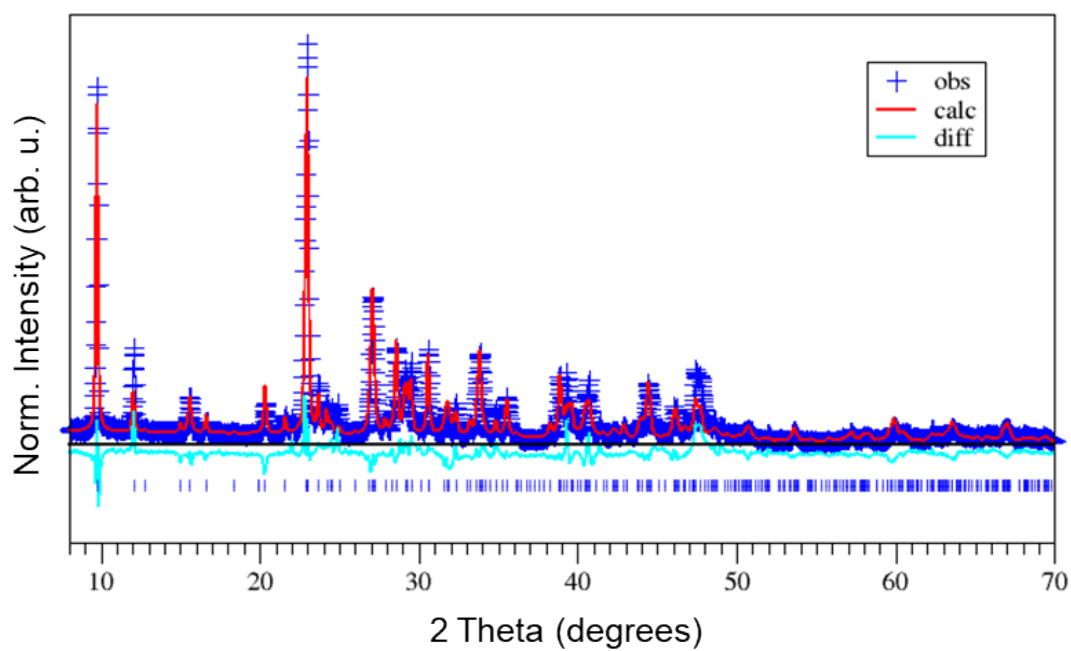

**Fig. S3** Rietveld refinement plot for Bi25. Observed and calculated traces in blue and red, respectively, with the difference plot (in cyan) and peak markers (blue bars) at the bottom.

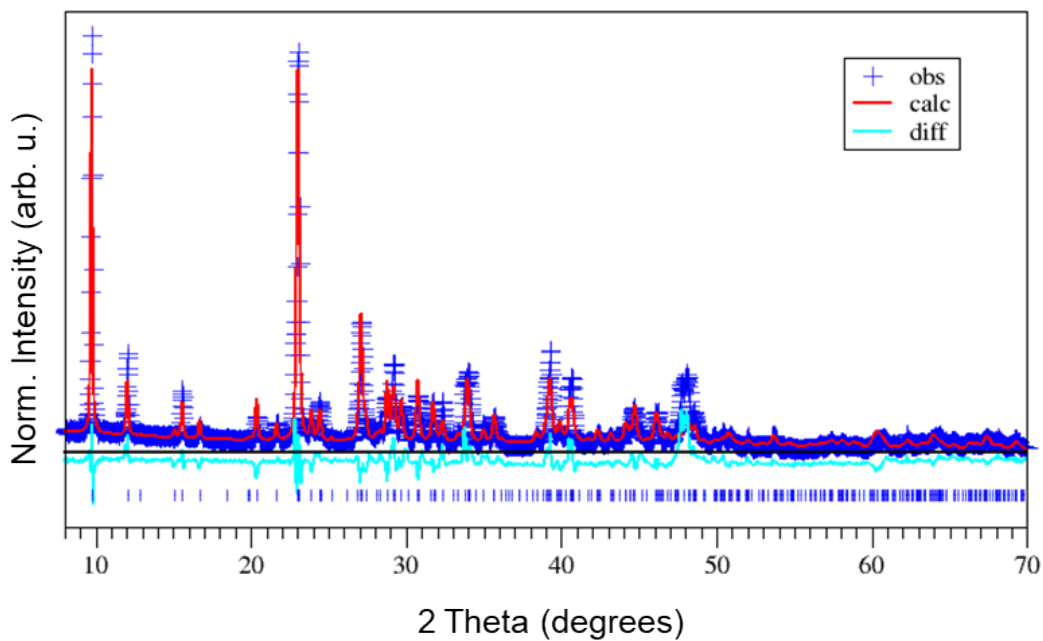

**Fig. S4** Rietveld refinement plot for Bi50. Observed and calculated traces in blue and red, respectively, with the difference plot (in cyan) and peak markers (blue bars) at the bottom.

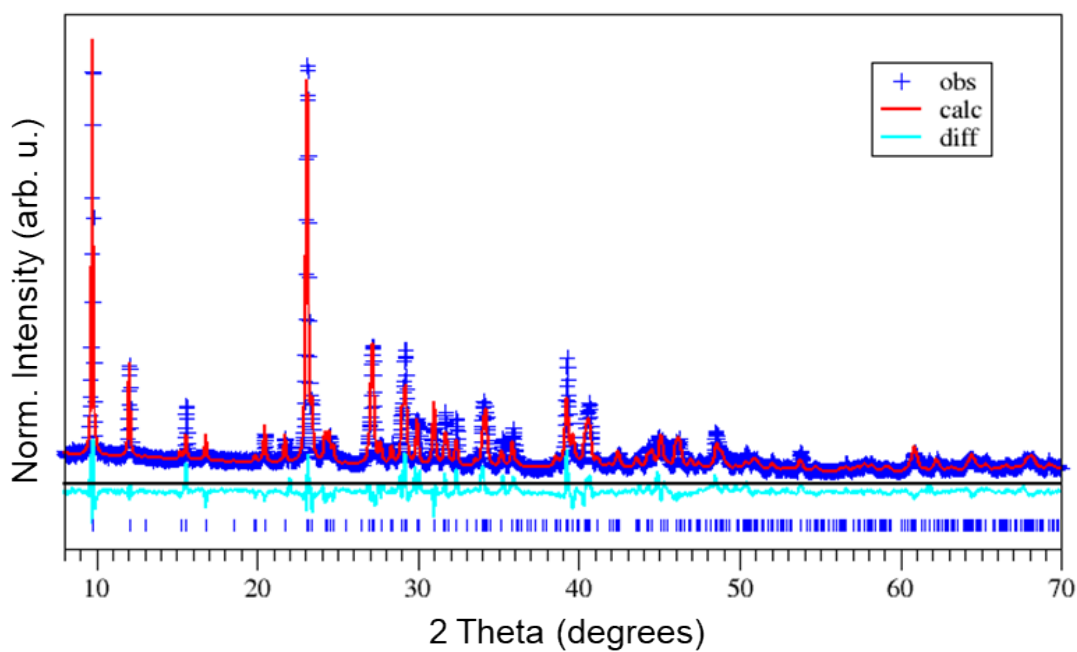

**Fig. S5** Rietveld refinement plot for Bi75. Observed and calculated traces in blue and red, respectively, with the difference plot (in cyan) and peak markers (blue bars) at the bottom.

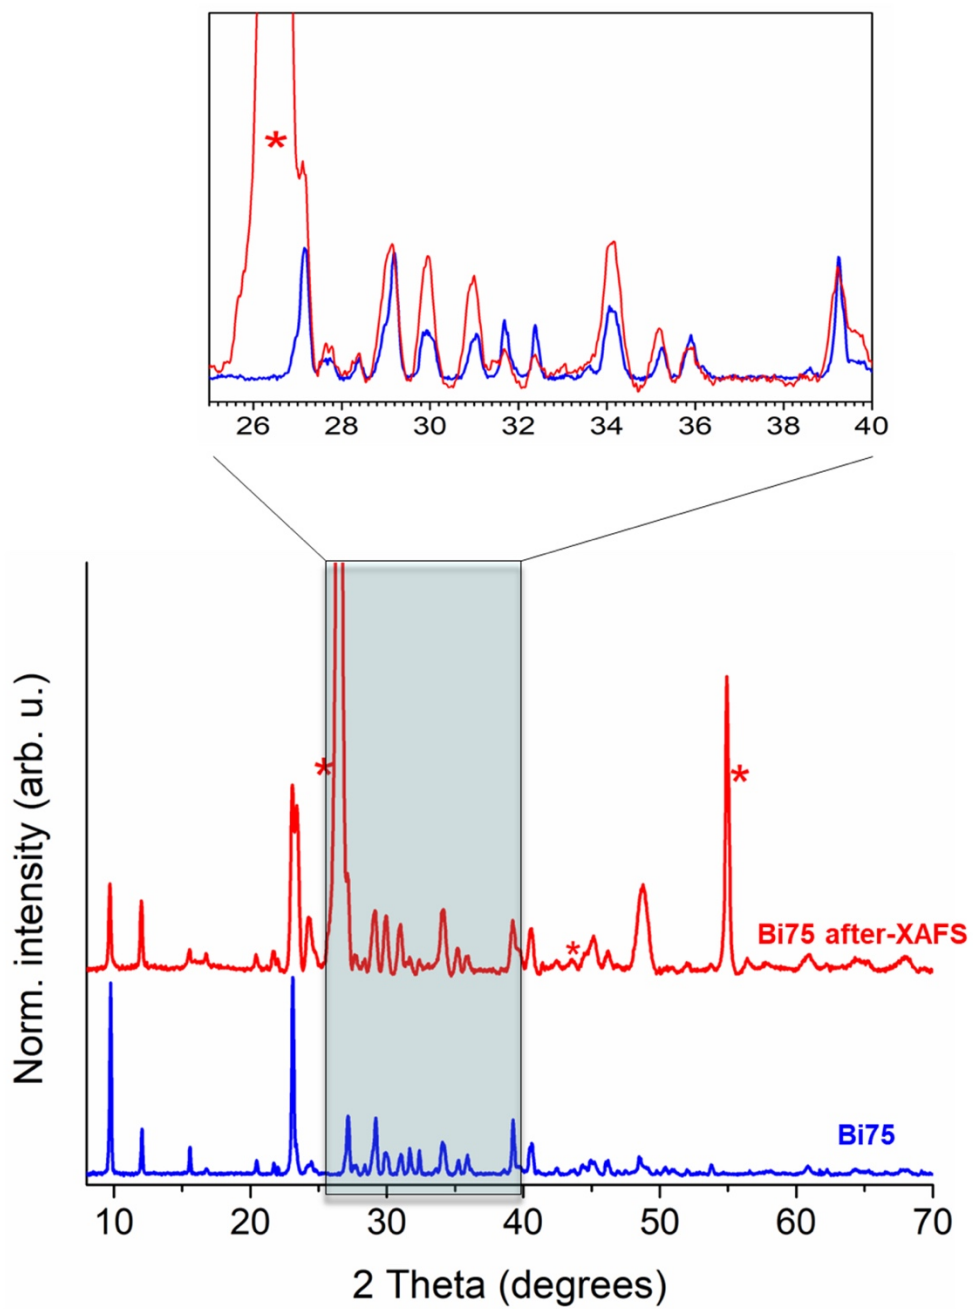

**Fig. S6** Diffraction data of Bi75 pre (blue) and after (red) XAFS with an enlargement of the 25–40° section, where the consistency of the peaks position is more evident. A red asterisk marks Bragg peaks due to the boron nitride dilutant.

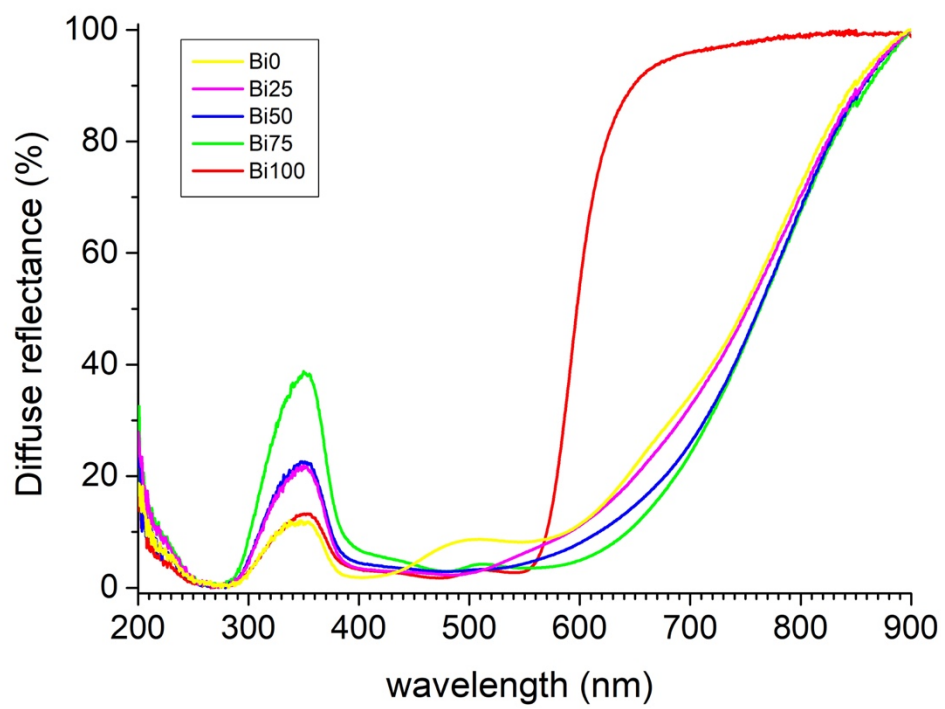

Fig. S7 UV-vis-NIR reflectance spectra of all samples as bulk powders.

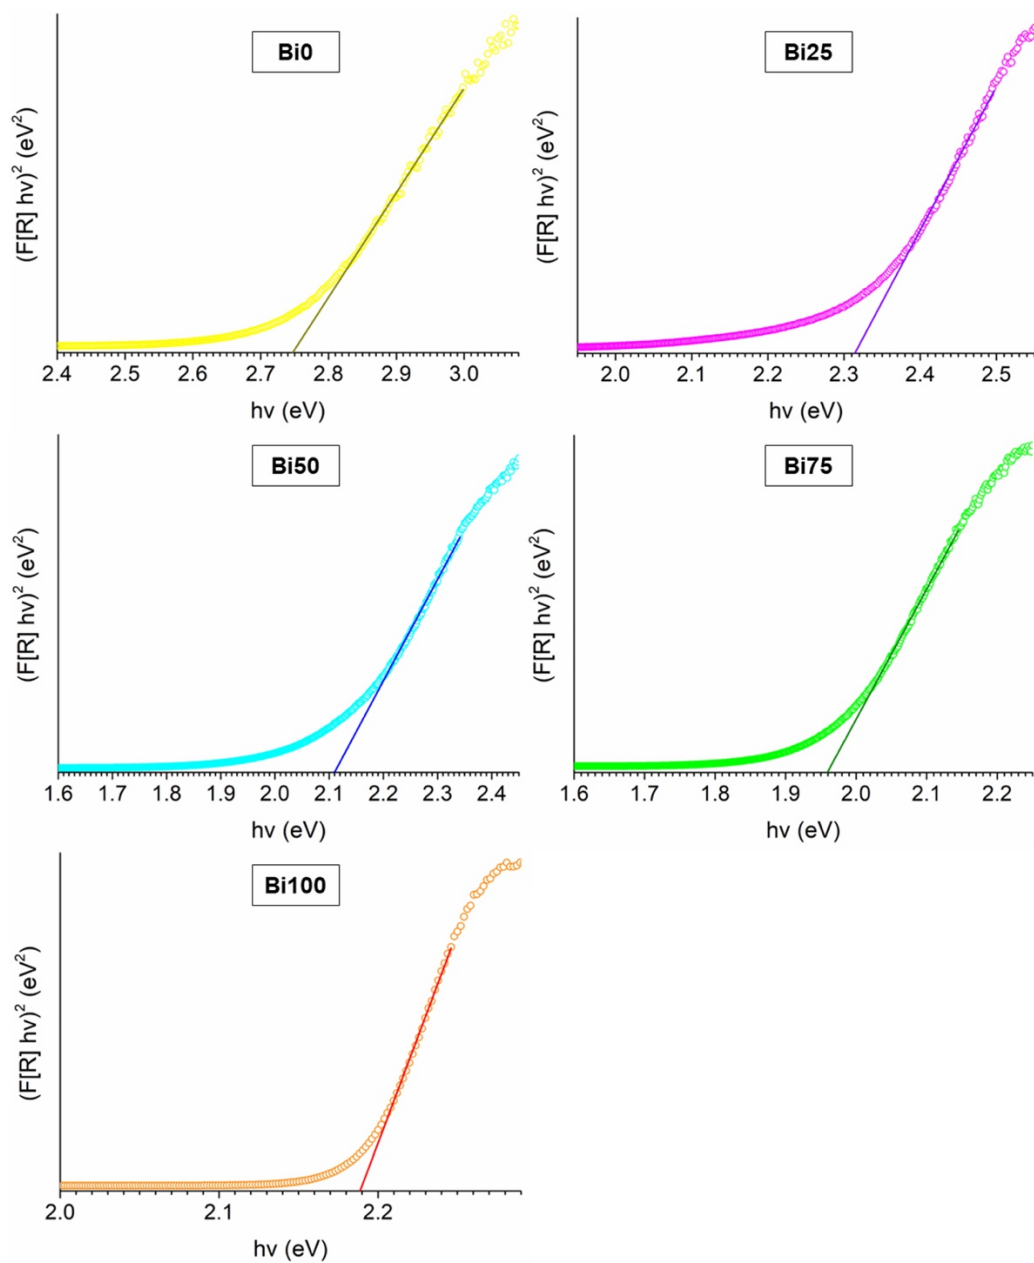

**Fig. S8** Tauc Plots of the powders of (a)  $(TMSO)SnI_3$ , (b-d)  $(TMSO)_3Sn_{3-x}Bi_{2(1-x)}I_9$  ( $0 \leq x \leq 1$ ), and (e)  $(TMSO)_3Bi_2I_9$ .

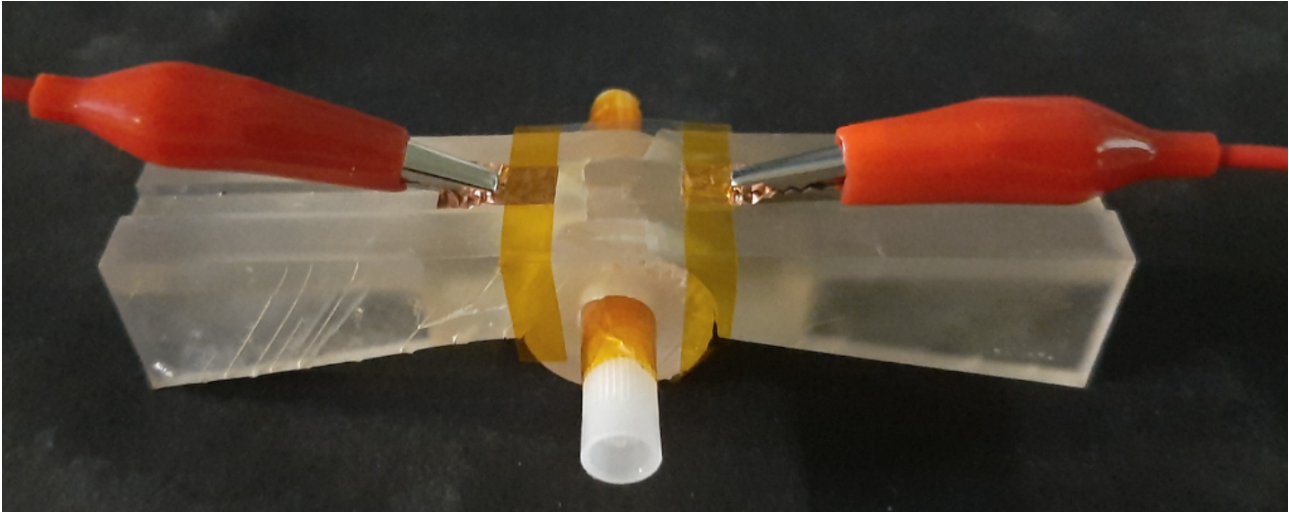

Fig. S9 Optical photograph of the piezoresistive sensor mounted on the bending device.

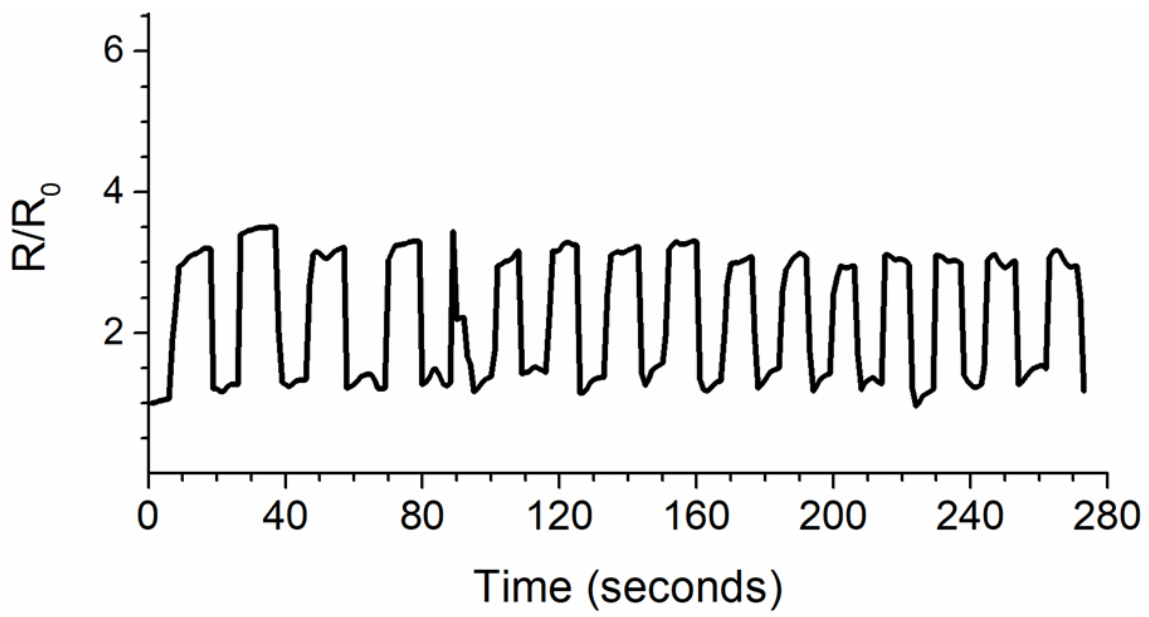

Fig. S10 Electrical resistance response of multicycle 0-90° bending of the Bi75 sample.

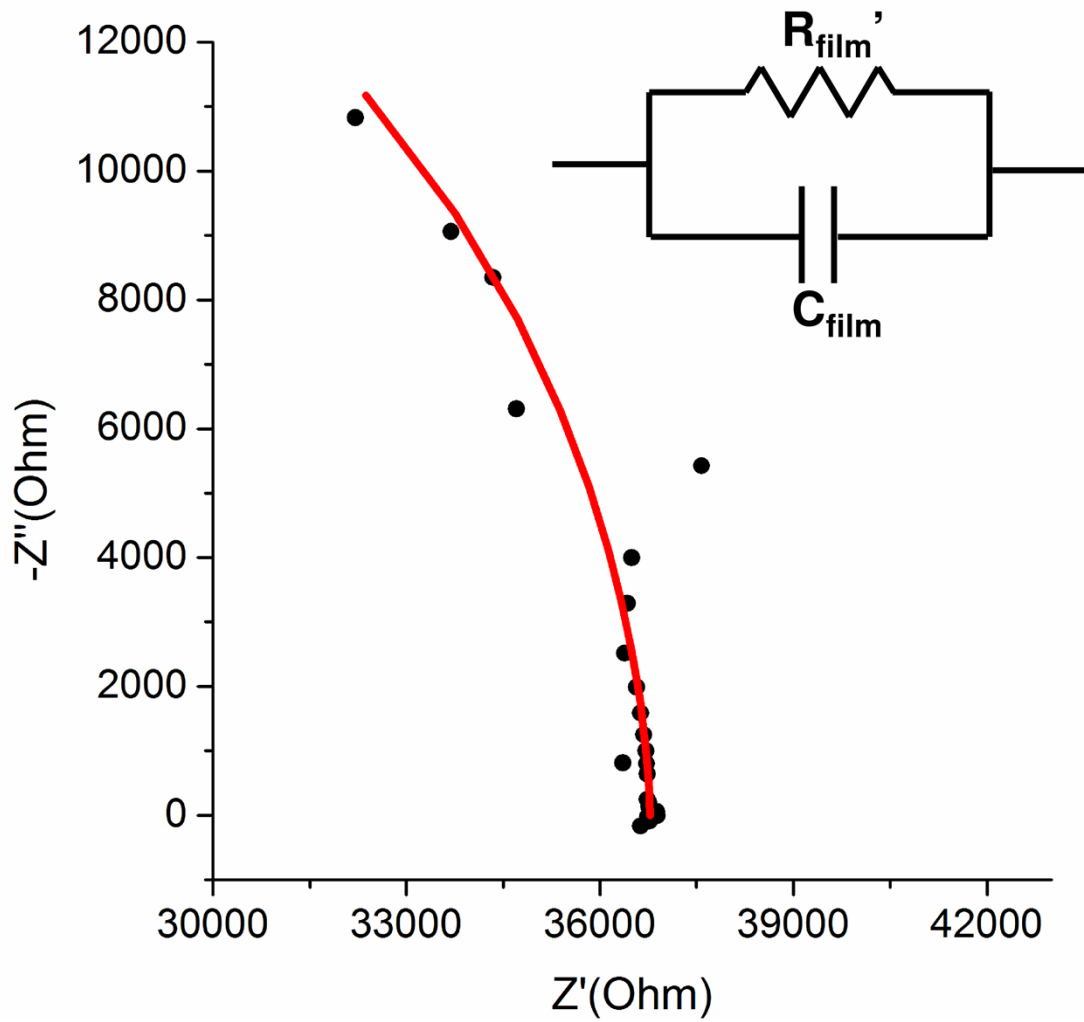

Fig. S11 Nyquist plots and relative fits of Bi75 bending after 0°-90°-0° bending cycles reporting the best fits for model circuit 2.
